# Supplementary material for: Selective dual-purpose photocatalysis for simultaneous H2 evolution and mineralization of organic compounds enabled by a Cr2O3 barrier layer coated on Rh/SrTiO3
Source: Royal Society of Chemistry journal article supplement (doi:10.1039/c6cc04260k), 2016-01-01
Supplement: c6cc04260k1.pdf [file c6cc04260k1.pdf]

**Electronic Supplementary Information (ESI)**

**Selective dual-purpose photocatalysis for simultaneous H<sub>2</sub>  
evolution and mineralization of organic compound enabled by  
Cr<sub>2</sub>O<sub>3</sub> barrier layer coated on Rh/SrTiO<sub>3</sub>**

Young-Jin Cho<sup>1</sup>, Gun-hee Moon<sup>1</sup>, Tomoki Kanazawa<sup>2</sup>, Kazuhiko Maeda<sup>2</sup>,  
Wonyong Choi<sup>1,\*</sup>

*<sup>1</sup> School of Environmental Science and Engineering, Pohang University of Science and  
Technology (POSTECH), Pohang 790-784, Korea*

*<sup>2</sup> Department of Chemistry, School of Science, Tokyo Institute of Technology, 2-12-1-NE-2  
Ookayama, Meguro-ku, Tokyo 152-8550, Japan*

\*E-mail: wchoi@postech.edu

## Experimental section

### Preparation of photocatalysts

Cr<sub>2</sub>O<sub>3</sub>/Rh/SrTiO<sub>3</sub> photocatalyst was prepared by two-step photodeposition method similar to the reported method.<sup>1</sup> Rh was first photodeposited on SrTiO<sub>3</sub> (Aldrich, powder, 99%). Briefly, an aqueous suspension of SrTiO<sub>3</sub> (0.5 g) was irradiated with a 200 W mercury lamp for 30 min in the presence of Rh precursor (RhCl<sub>3</sub>•3H<sub>2</sub>O). Methanol (1 M, J. T. Baker) was added as an electron donor. The amount of Rh loading was fixed at 0.5 wt%. After the suspension was irradiated for 30 min, the Rh/SrTiO<sub>3</sub> powder was collected by filtration, washed with distilled water and dried overnight at 353 K. Cr<sub>2</sub>O<sub>3</sub> was further deposited on Rh/SrTiO<sub>3</sub> using K<sub>2</sub>CrO<sub>4</sub> as precursor. The loading amount of Cr<sub>2</sub>O<sub>3</sub> was fixed at 0.75 wt%. The Rh/SrTiO<sub>3</sub> powder (250 mg) was dispersed in an aqueous K<sub>2</sub>CrO<sub>4</sub> solution and was irradiated with a 200 W mercury lamp for 2 h without external electron donor in de-aerated condition to reduce K<sub>2</sub>CrO<sub>4</sub> to Cr<sub>2</sub>O<sub>3</sub>.<sup>1, 2</sup> The final product was washed thoroughly with distilled water and dried overnight at 353 K. F-TiO<sub>2</sub>/Pt photocatalyst was prepared as reported.<sup>3</sup> Pt was deposited on the surface of TiO<sub>2</sub> (Degussa P25) by the photocatalytic reduction of chloroplatinic acid (Pt content = 1.0 wt%) in the presence of methanol as an electron donor. For the fluorination of Pt/TiO<sub>2</sub> surface, 10 mM NaF was added into the aqueous suspension of Pt/TiO<sub>2</sub> and then pH was adjusted to the desired value.

### Photocatalytic activity measurements

15 mg of catalyst powder was dispersed in distilled water (30 mL) by sonication for 60 seconds in an ultrasonic cleaning bath. Appropriate amount of the substrate stock solution was subsequently added to the suspension to give a desired initial concentration. The pH of the aqueous suspension was adjusted with concentrated NaOH or HClO<sub>4</sub> solution. The solution was purged by Ar gas for 1 h prior to irradiation while it was stirred in dark. The reactor was irradiated by a 300-W Xe arc lamp (Oriel). The light passed through a 10 cm IR filter and a UV cutoff filter ( $\lambda \geq 320$  nm) under continuous stirring. The filtered was focused onto a 55 mL glass reactor (25 mL headspace) which was sealed with a rubber septum. The amount of evolved H<sub>2</sub> and O<sub>2</sub> in the headspace of the photocatalytic reactor was analyzed using gas chromatography (GC, HP6890A) equipped with a thermal conductivity detector. To determine the apparent photonic efficiency (APE) for H<sub>2</sub> production, the photocatalytic reaction experiments were also carried out under irradiation of monochromated UV light from a Xe lamp (centered at  $\lambda = 330$  nm). The incident photon flux was measured using a Power meter (Newport 1830-C) and then converted into an incident photon flux ( $I_{in}$ ), which was estimated to be  $1.33 \times 10^{-3}$  Einstein h<sup>-1</sup> assuming the monochromatic wavelength of 330 nm. APE of H<sub>2</sub> production was calculated by  $APE = 2 \times [(\text{number of H}_2 \text{ molecules generated})/(\text{number of incident photons})]$ . The concentration of 4-CP was measured using high performance liquid chromatography (HPLC, Agilent 1100 series) equipped with a diode array detector. The chloride ion (Cl<sup>-</sup>) was analyzed using ion chromatography (IC, Dionex

DX-120) that was equipped with a conductivity detector and an AS-14 (4 mm X 250 mm) column. The total organic carbon (TOC) of organic substrates was measured using a TOC analyzer (TOC-VCSH, Shimadzu).

### Photoelectrochemical tests

The measurement of photocurrent collected on an inert electrode (Pt) immersed in an aqueous suspension of catalyst were carried out with a three-electrode system similar to the previous report.<sup>4</sup> The Fe<sup>3+/2+</sup> redox couple was used as an electron shuttle which transfers the electrons from the photocatalyst particles to the Pt collector electrode in the continuously Ar purged system. A Pt wire, a Ag/AgCl electrode, and a graphite rod were used as a working, a reference, and a counter electrode, respectively. Photocatalyst suspension (1.0 g/L) with 0.5 mM Fe<sup>3+</sup> (an electron shuttle) and 0.1 M NaClO<sub>4</sub> (electrolyte) at pH 3 was irradiated by a 300-W Xe arc lamp with a UV cutoff filter ( $\lambda \geq 320$  nm). Photocurrent was collected in the suspension by applying a potential (+0.7 vs. Ag/AgCl) to the Pt working electrode using a potentiostat (Gamry, Reference 600)

### References

1. K. Maeda, K. Teramura, D. Lu, N. Saito, Y. Inoue and K. Domen, *Angew. Chem. Inter. Ed.*, 2006, **45**, 7806-7809.
2. B. Sun, E. P. Reddy and P. G. Smirniotis, *Environ. Sci. Technol.*, 2005, **39**, 6251-6259.
3. J. Kim, D. Monllor-Satoca and W. Choi, *Energy Environ. Sci.*, 2012, **5**, 7647-7656.
4. H. Park and W. Choi, *J. Phys. Chem. B*, 2003, **107**, 3885-3890.

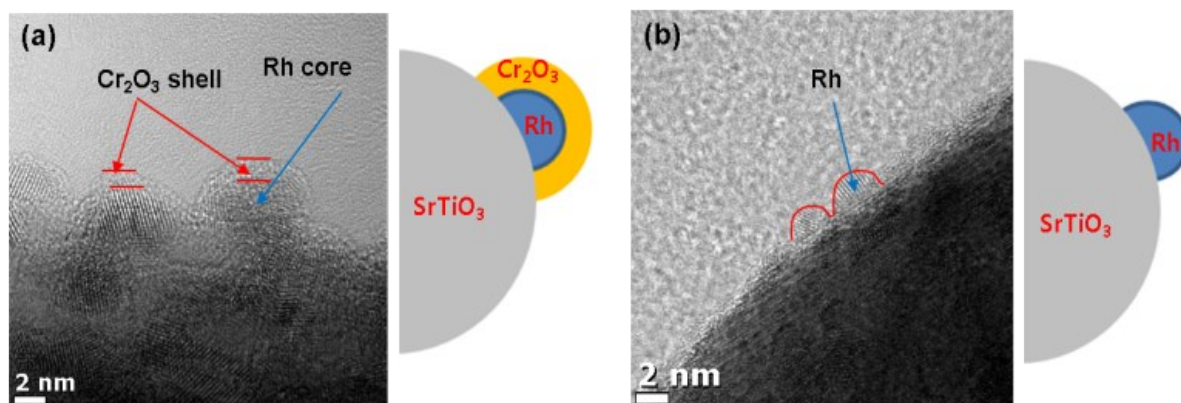

**Fig. S1.** HRTEM images of  $\text{Cr}_2\text{O}_3/\text{Rh}/\text{SrTiO}_3$  and  $\text{Rh}/\text{SrTiO}_3$ .

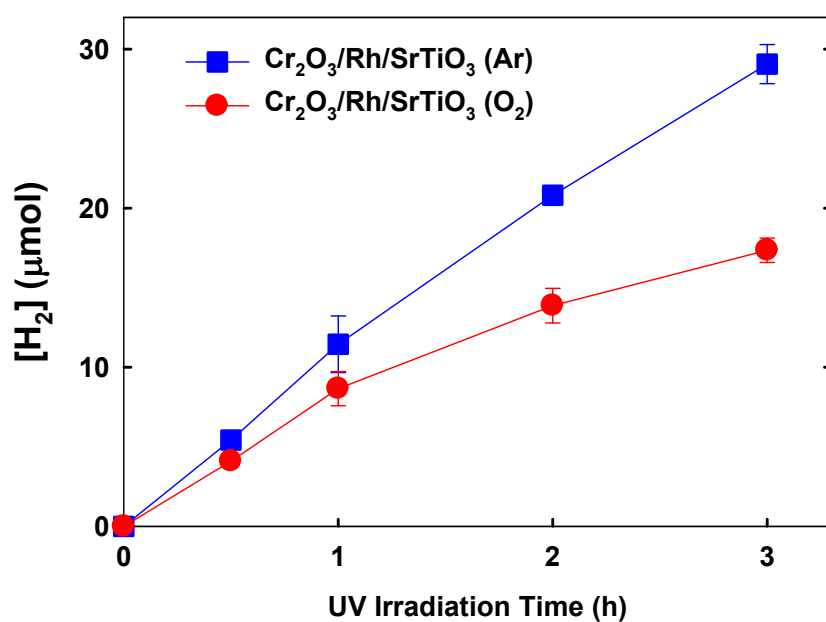

**Fig. S2.** Comparison of time profiles of  $\text{H}_2$  production between Ar-saturated and air-saturated suspension of  $\text{Cr}_2\text{O}_3/\text{Rh}/\text{SrTiO}_3$ . Experimental conditions:  $[\text{catalyst}] = 0.5 \text{ g L}^{-1}$ ,  $[\text{4-CP}]_0 = 100 \mu\text{M}$ ,  $\text{pH}_0 = 7$ ,  $\lambda > 320 \text{ nm}$ , air-tight, and initially Ar-purged for 1 h before UV irradiation.

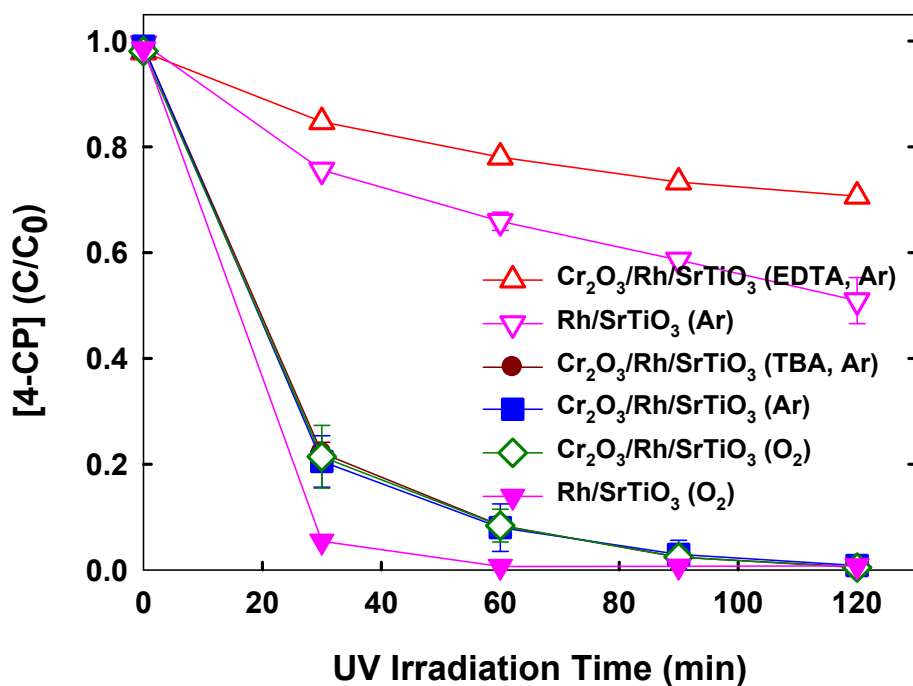

**Fig. S3.** Effects of dissolved O<sub>2</sub>, TBA (OH radical scavenger), EDTA (hole scavenger) on the photocatalytic degradation of 4-CP in the suspensions of Cr<sub>2</sub>O<sub>3</sub>/Rh/SrTiO<sub>3</sub> and Rh/SrTiO<sub>3</sub>.

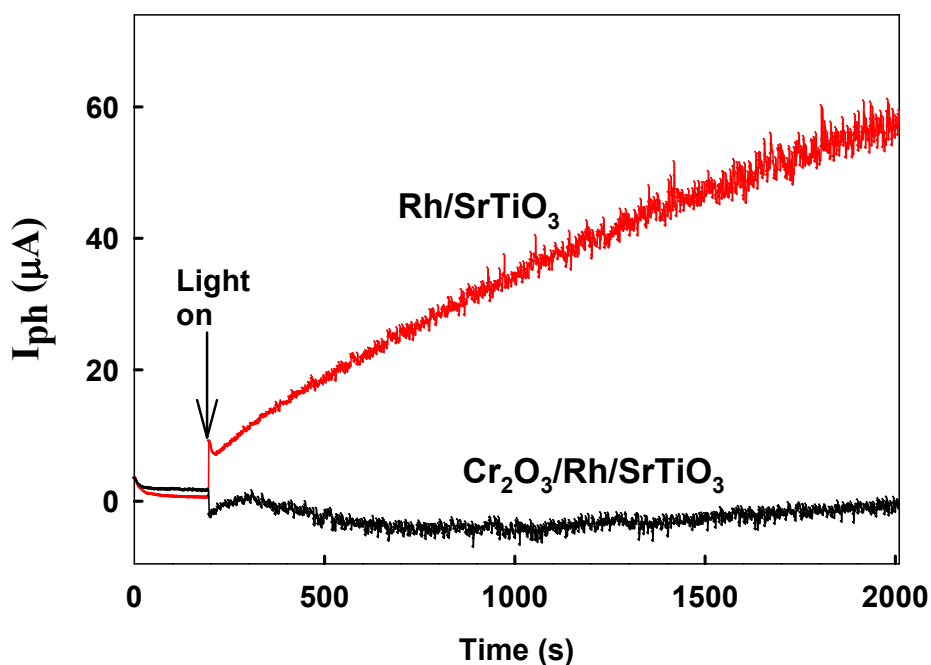

**Fig. S4.** Time profiles of Fe<sup>3+</sup>-mediated photocurrent collected on a Pt electrode in UV light-irradiated suspension of photocatalysts.

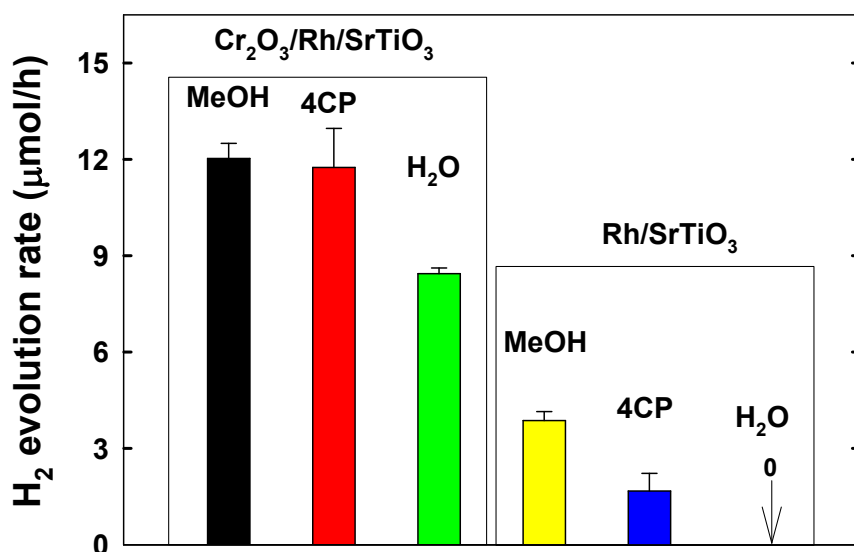

**Fig. S5.** Comparison of the H<sub>2</sub> production rates between Cr<sub>2</sub>O<sub>3</sub>/Rh/SrTiO<sub>3</sub> and Rh/SrTiO<sub>3</sub> photocatalytic systems with 4-CP (300 μM), MeOH (10 vol%), or no organic electron donor (H<sub>2</sub>O) (at pH 7).. Experimental conditions: [catalyst] = 0.5 g/L, λ > 320 nm, air-tight and initially Ar-purged for 1 h before UV irradiation.

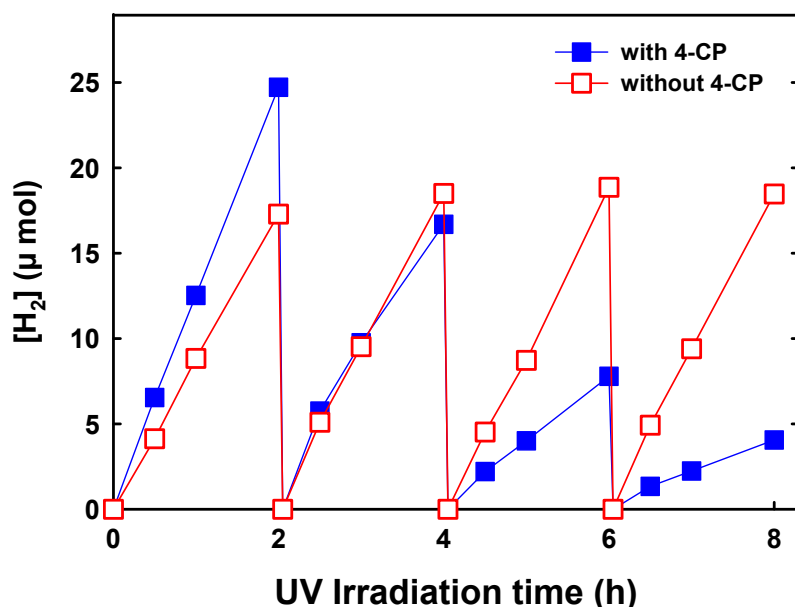

**Fig. S6.** Repeated cycle tests of Cr<sub>2</sub>O<sub>3</sub>/Rh/SrTiO<sub>3</sub> photocatalyst in the presence and absence of 4-CP. Experimental conditions: [catalyst] = 0.5 g L<sup>-1</sup>, pH<sub>0</sub> = 7, λ > 320 nm, air-tight, injection of 100 μM 4-CP at the beginning of each cycle (for the case of “with 4-CP”), and initially Ar-purged for 1 h before UV irradiation and at the beginning of each cycle.

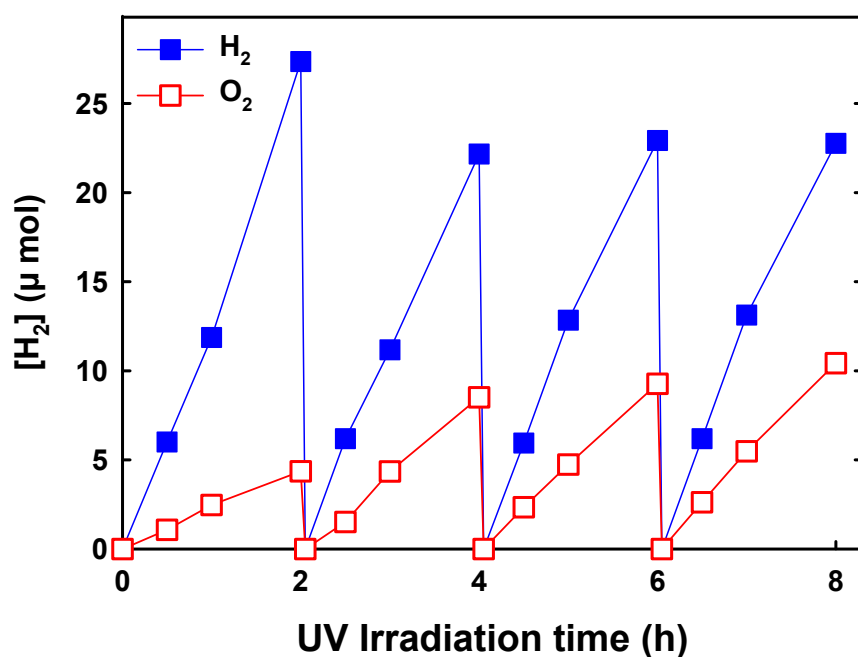

**Fig. S7.** Photocatalytic evolution of H<sub>2</sub> and O<sub>2</sub> during the repeated cycles. 4-CP (100 μM) was initially added before starting the first cycle and not replenished in the following cycles. At the end of each cycle, the suspension was purged with Ar. Experimental conditions: [catalyst] = 0.5 g/L,  $\lambda > 320$  nm, air-tight and initially Ar-purged for 1 h before UV irradiation.
